# Supplementary material for: Sharp-featured Au@Ag core/shell nanocuboid synthesis and the label-free ultrasensitive SERS detection of protein single-point mutations
Source: Royal Society of Chemistry journal article supplement (doi:10.1039/c8qm00185e), 2018-01-01
Supplement: c8qm00185e1.pdf [file c8qm00185e1.pdf]

# Sharp-featured Au@Ag Core/shell Nanocuboids Synthesis and the Label-free Ultrasensitive SERS Detection of Protein Single-point Mutation

Guopeng Tu,<sup>‡</sup><sup>a</sup> Ntirikwendera Deogratias,<sup>‡</sup><sup>a</sup> Meng Xu,<sup>\*a</sup> Xiaowei Li,<sup>b</sup> Jiajia Liu,<sup>a</sup>  
Lan Jiang,<sup>b</sup> Yanlian Yang<sup>c</sup> and Jiatao Zhang<sup>\*a</sup>

<sup>a</sup> Beijing Key Laboratory of Construction-Tailorable Advanced Functional Materials and Green Applications, School of Materials Science & Engineering, Beijing Institute of Technology, Beijing, 100081, China

<sup>b</sup> School of Mechanical Engineering, Beijing Institute of Technology, Beijing, 100081, China

<sup>c</sup> National Center for Nanoscience and Technology, Chinese Academy of Sciences (CAS), Beijing, 100190, China

Corresponding Author: xumeng@bit.edu.cn, zhangjt@bit.edu.cn

## Present Addresses

Beijing Institute of Technology, Beijing 100081, China. Tel.: +86 10 68918065; Fax: +86 10 68918065. E-mail: zhangjt@bit.edu.cn, xumeng@bit.edu.cn.

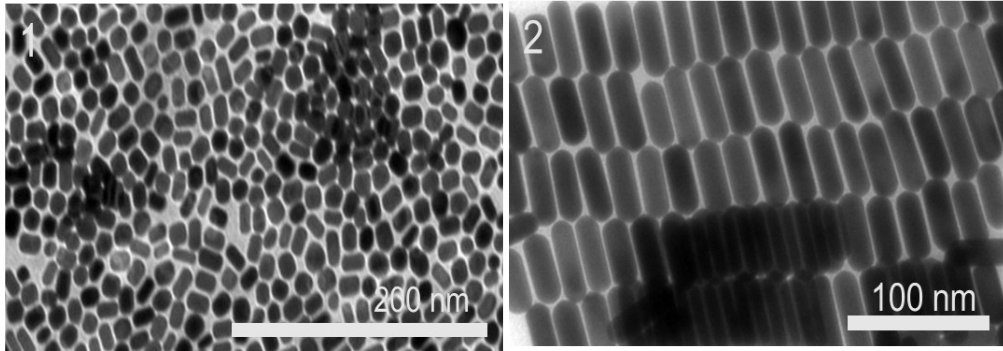

**Figure S1.** TEM images of the two sets of original gold NRs synthesized using sodium salicylate (on the right), and sodium oleate (left) as the additive.

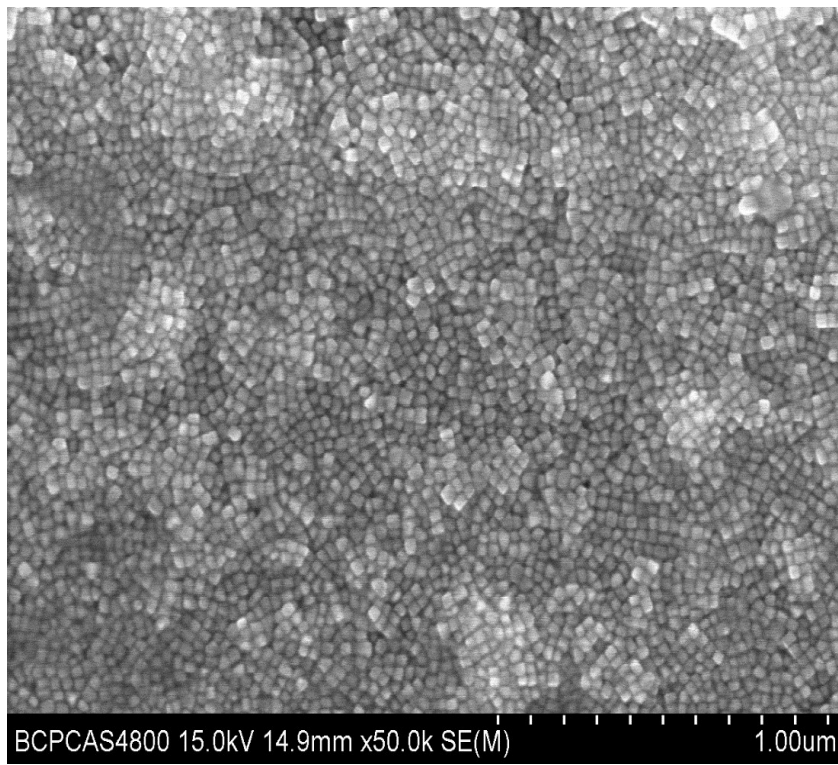

**Figure S2.** Large scale SEM image of the as prepared Au@Ag nanocuboids with Au-1 NRs.

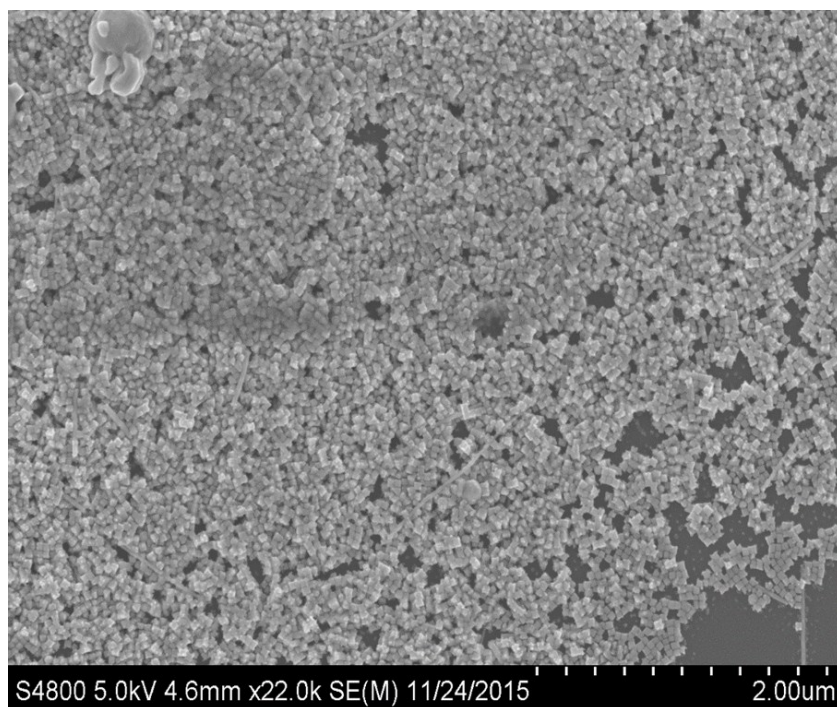

**Figure S3.** Large scale image of Au@Ag nanocuboids prepared with Au-2 NRs.

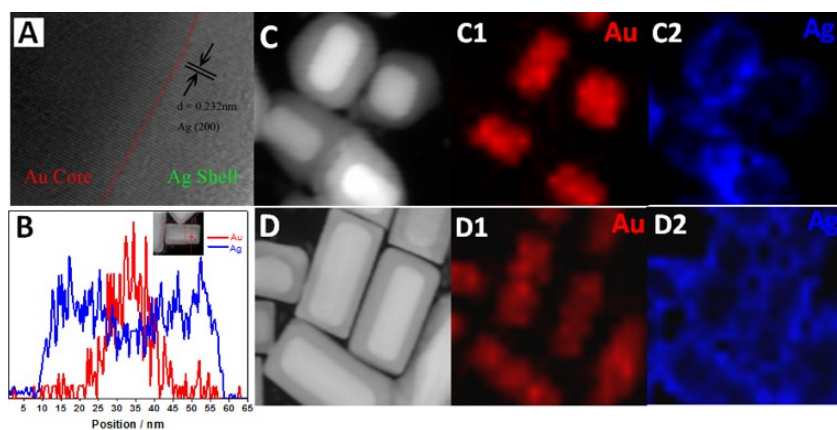

**Figure S4.** (A) HRTEM images of typical Au@Ag core/shell NCs; (B) Line scanning of the Au@Ag core/shell NCs; (C and D) EDS elemental mapping of Au@Ag core/shell NCs with AR = 1 and 2, respectively.

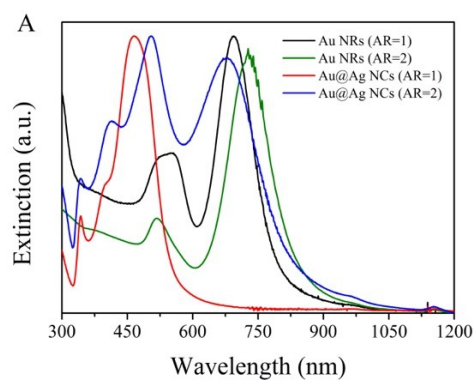

**Figure S5.** UV-Vis-NIR spectra of Au-1 NRs (black), Au-2 NRs (green) and Au@Ag-1 NCs (red), Au@Ag-2 NCs (blue) colloids.

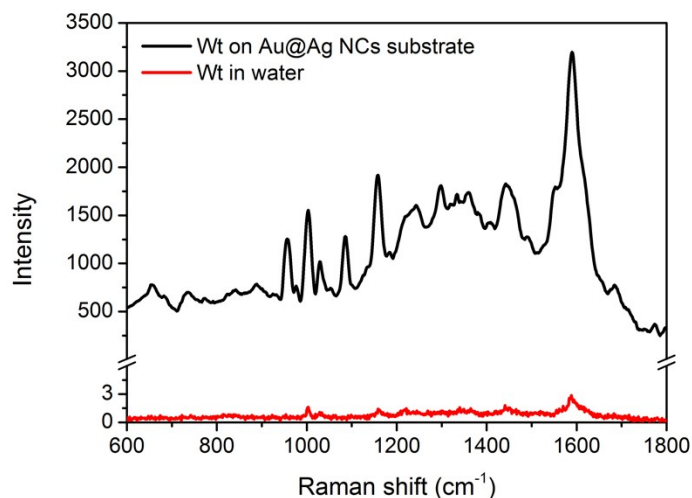

**Figure S6.** SERS spectra of Wt (10 pM) on Au@Ag NCs assembly (black) and Raman spectra of Wt (1 mM) in water (red).

#### SI-1 Calculation for enhancement factors:

Enhancement factor (EF) for Au@Ag-1 NCs substrate was estimated using the expression  $EF = (I_{SERS} / I_{solution}) \times (N_{solution} / N_{SERS})$ .<sup>1</sup> EF is calculated by direct comparison of the intensities provided by the SERS ( $I_{SERS}$ ) and solution Raman ( $I_{solution}$ ) experiments and the total number of molecules in the SERS ( $N_{SERS}$ ) and solution Raman ( $N_{solution}$ ) experiments. A concentrated Wt protein solution (1 mM in DI water) was measured by using the solution Raman experiment under the same conditions that the experiments carried out Au@Ag-1 NCs. The light spot diameter of the SERS laser was 2  $\mu$ m. The size of the quartz cell used for solution Raman experiment was 1  $\times$  1  $\times$  3 cm. The  $I_{SERS}$  and  $I_{solution}$  at 1590  $\text{cm}^{-1}$  were 3195.5 and 2.84, respectively.

#### Reference for SI-1:

1. Mulvihill, M. J.; Ling, X. Y.; Henzie, J.; Yang, P. *J. Am. Chem. Soc.* **2010**, 132, 268.

Wt TDP-43:

H<sub>2</sub>N-QGGFGNSRGGGAGLGNNQGSNMGGGMNFG**A**FSINPAMMAAAQAALQ-COOH

pA315T TDP-43: H<sub>2</sub>N-

QGGFGNSRGGGAGLGNNQGSNMGGGMNFG**T**(**p**)FSINPAMMAAAQAALQ-COOH

A315E TDP-43:

H<sub>2</sub>N-QGGFGNSRGGGAGLGNNQGSNMGGGMNFG**E**FSINPAMMAAAQAALQ-COOH

**Scheme S1** The sequences for Wt, pA315T and A315E TDP-43. The red capital letters ‘‘A’’, ‘‘T’’, and ‘‘E’’ highlight the mutation site, and ‘‘p’’ in the bracket points out the phosphorylated residue Thr315 for pA315T TDP-43.

**Table S1** Assignment of bands in SERS spectra of TDP-43 and IAPP8-37 protein

| Wavenumber (cm <sup>-1</sup> ) | Assignment                                | Ref.   |
|--------------------------------|-------------------------------------------|--------|
| 823                            | Tyr                                       | 1-2    |
| 850-856                        | Tyr                                       | 1-2    |
| 899-902                        | Pro                                       | 3      |
| 957-960                        | C-C stretching                            | 1-2, 4 |
| 1000-1004                      | Phe                                       | 1-2, 4 |
| 1030-1036                      | Phe                                       | 1-2, 4 |
| 1080-1089                      | Lys, Arg, Gln, Asn                        | 2      |
| 1124                           | Val, Ile                                  | 2      |
| 1154-1160                      | C-N stretching                            | 1-2, 4 |
| 1218-1220                      | -CH <sub>3</sub> bending                  | 1-2, 5 |
| 1240-1246                      | Amide III ( $\beta$ -sheet)               | 1-2    |
| 1262-1265                      | Amide III ( $\alpha$ -helix, random coil) | 1-2    |
| 1325-1336                      | -CH <sub>2</sub> twist/wag                | 1-2, 5 |
| 1443-1455                      | -CH <sub>2</sub> bending                  | 1, 4   |
| 1479-1485                      | His                                       | 1, 2   |
| 1522                           | Amide III                                 | 4      |
| 1588-1592                      | Phe                                       | 1-2    |

**Reference for Table S1:**

1. Chou, I. H.; Benford, M.; Beier, H. T.; Coté G. L. *Nano Lett.* **2008**, 8, 1729.
2. Choi, I.; Huh, Y. S.; Erickson, D. *Microfluid Nanofluid* **2012**, 12, 663.
3. Kurouski, D.; Deckert-Gaudig, T.; Deckert, V.; Lednev, I. K. *J. Am. Chem. Soc.* **2012**, 134, 13323.

4. Brulé, T.; Yockell-Lelièvre, H.; Bouhélier, A.; Margueritat, J.; Markey, L.; Leray, A.; Dereux, A.; Finot, E. *J. Phys. Chem. C* **2014**, 118, 17975.
5. Podstawka-Proniewicz, E.; Piergies, N.; Skozuba, D.; Kafarski, P.; Kim, Y.; Proniewicz, L. M. *J. Phys. Chem. A* **2011**, 115, 11067.
